# Supplementary material
Source: Springer Nature journal article supplement (https://www.springermedizin.de/resource/supplementary/12889_2012_4554_MOESM3_ESM.pdf/9493432)
Supplement: MOESM3 [file 9493432]

Additional file 3. List of in-country collaborating partners (local review boards)

| <b>Country</b>                   | <b>Country focal point</b>                                   |
|----------------------------------|--------------------------------------------------------------|
| Bangladesh                       | Mitra and Associates                                         |
| Bosnia and Herzegovina           | The Federal Public Health Institute                          |
| Brazil                           | Fundacao Oswaldo Cruz                                        |
| Burkina Faso                     | Institut de Recherche en Sciences de la Santé                |
| Chad                             | Faculté des Sciences de la Santé, Univ N'Djamena             |
| China                            | Centre for Health Statistics Information                     |
| Comoros                          | Bureau Comorien de Conseil                                   |
| Congo                            | Unité de recherche sur les systèmes de santé                 |
| Cote d'Ivoire                    | Ministère de la Santé                                        |
| Croatia                          | The Croatian National Institute of Public Health             |
| Czech Republic                   | Institute of Health Information and Statistics               |
| Dominican Republic               | Centro de Estudios Sociales y Demográficos (CESDEM)          |
| Ecuador                          | Fundación Ecuatoriana para la Salud y el Desarroll (FESALUD) |
| Estonia                          | Saar Poll Ltd.                                               |
| Ethiopia                         | Department of Community Health, Jimma University             |
| Georgia                          | Georgian State Medical Academy (GSMA)                        |
| Ghana                            | Department of Community Health, Ghana Medical School         |
| Hungary                          | Johan Bela National Centre for Epidemiology                  |
| India                            | International Institute of Population Sciences               |
| Kazakhstan                       | Kazakhstan School of Public Health (KSPH)                    |
| Kenya                            | Central Bureau of Statistics                                 |
| Lao People's Democratic Republic | National Institute of Public Health, Ministry of Health      |
| Latvia                           | The Health Promotion Center                                  |
| Malawi                           | Centre for Social Research (CSR)                             |
| Malaysia                         | Public Health Institute, Ministry of Health                  |
| Mali                             | Cellule de Planification et de Statistique, (CPS)            |
| Mauritania                       | Office Nationale de la Statistique (ONS)                     |
| Mauritius                        | Mauritius Institute of Health                                |
| Mexico                           | Instituto Nacional de Salud Pública                          |
| Morocco                          | Ministère de la Santé                                        |
| Myanmar                          | Department of Medical Research, Ministry of Health           |
| Namibia                          | Ministry of Health                                           |
| Nepal                            | ORG-MARG Nepal PVT.Ltd                                       |
| Pakistan                         | Ministry of Health                                           |
| Paraguay                         | Fac.de Ciencias Veterinarias, Univ. Nacional/DGEEC           |
| Philippines                      | College of Medicine, University of the Philippines           |
| Russian Federation               | Semashko Institute for Research on Social Hygiene            |
| Senegal                          | Direction Etudes, Recherche et Formation (DERF)              |
| Slovakia                         | Environment,s.c., Centre of Biostatistics and Envi           |
| South Africa                     | Community Agency for Social Enquiry (CASE)                   |
| Sri Lanka                        | Ministry of Health                                           |
| Swaziland                        | Faculty of Health Sciences, Univ Swaziland                   |
| Tunisia                          | Institut National de la Santé Publique                       |
| Ukraine                          | Odessa State Medical University                              |
| Uruguay                          | Centro de Estudios de Economia y Salud (CEES)                |
| Viet Nam                         | Ministry of Health                                           |
| Zambia                           | School of Humanities & Social Sciences, University of Zambia |
| Zimbabwe                         | Community Health, University of Zimbabwe                     |
